# Supplementary material for: Site-specific anchoring aptamer C2NP on DNA origami nanostructures for cancer treatment
Source: Royal Society of Chemistry journal article supplement (doi:10.1039/c8ra04589e), 2018-01-01
Supplement: c8ra04589e1.pdf [file c8ra04589e1.pdf]

## Supporting information

Table S1 DNA sequences used in this paper.

| Name | Sequences (from 5' to 3')           | Length (n.t.) |
|------|-------------------------------------|---------------|
| 1    | CAAGCCCAATAGGAAC CCATGTACAAACAGTT   | 32            |
| 2    | AATGCCCCGTAACAGT GCCCGTATCTCCCTCA   | 32            |
| 3    | TGCCTTGACTGCCTAT TTCGGAACAGGGATAG   | 32            |
| 4    | GAGCCGCCCCACCACC GGAACCGCGACGGAAA   | 32            |
| 5    | AACCAGAGACCCTCAG AACCGCCAGGGGTCAG   | 32            |
| 6    | TTATTCATAGGGAAGG TAAATATT CATTCAAGT | 32            |
| 7    | CATAACCCGAGGCATA GTAAGAGC TTTTAAAG  | 32            |
| 8    | ATTGAGGGTAAAGGTG AATTATCAATCACCGG   | 32            |
| 9    | AAAAGTAATATCTTAC CGAAGCCCTTCCAGAG   | 32            |
| 10   | GCAATAGCGCAGATAG CCGAACAATTCAACCG   | 32            |
| 11   | CCTAATTTACGCTAAC GAGCGTCTAATCAATA   | 32            |
| 12   | TCTTACCAGCCAGTTA CAAAATAAATGAAATA   | 32            |
| 13   | ATCGGCTGCGAGCATG TAGAAACCTATCATAT   | 32            |
| 14   | CTAATTTATCTTTCCT TATCATTATCCTGAA    | 32            |
| 15   | GCGTTATAGAAAAAGC CTGTTTAG AAGGCCGG  | 32            |
| 16   | GCTCATTTTCGCATTA AATTTTTG AGCTTAGA  | 32            |
| 17   | AATTACTACAAATTCT TACCAGTAATCCCATC   | 32            |
| 18   | TTAAGACGTTGAAAAC ATAGCGATAACAGTAC   | 32            |
| 19   | TAGAATCCCTGAGAAG GTCAATAGGAATCAT    | 32            |
| 20   | CTTTTACACAGATGAA TATACAGTAAACAATT   | 32            |
| 21   | TTTAACGTTTCGGGAGA AACAAATAATTTCCCT  | 32            |
| 22   | CGACAATAAGTATTA GACTTTACAATACCGA    | 32            |
| 23   | GGATTTAGCGTATTAA ATCCTTTGTTTTCAGG   | 32            |
| 24   | ACGAACCAAAACATCG CCATTAATA TGGTGGTT | 32            |
| 25   | GAACGTGGCGAGAAAG GAAGGGAA CAACTAT   | 32            |
| 26   | TAGCCCTACCAGCAGA AGATAAAAACATTTGA   | 32            |
| 27   | CGGCCTTGCTGGTAAT ATCCAGAACGAACTGA   | 32            |
| 28   | CTCAGAGCCACCACCC TCATTTTCCTATTATT   | 32            |
| 29   | CTGAAACAGGTAATAA GTTTTAACCCCTCAGA   | 32            |
| 30   | AGTGTAAGGAAAGTA TTAAGAGGCCGCCACC    | 32            |

---

|    |                                    |    |
|----|------------------------------------|----|
| 31 | GCCACCACTCTTTTCA TAATCAAACCGTCACC  | 32 |
| 32 | GTTTGCCACCTCAGAG CCGCCACCGATACAGG  | 32 |
| 33 | GACTTGAGAGACAAA GGGCGACAAGTTACCA   | 32 |
| 34 | AGCGCCAACCATTTGG GAATTAGATTATTAGC  | 32 |
| 35 | GAAGGAAAATAAGAGC AAGAAACAACAGCCAT  | 32 |
| 36 | GCCCAATACCGAGGAA ACGCAATAGGTTTACC  | 32 |
| 37 | ATTATTTAACCCAGCT ACAATTTTCAAGAACG  | 32 |
| 38 | TATTTTGCTCCCAATC CAAATAAGTGAGTTAA  | 32 |
| 39 | GGTATTAAGAACAAGA AAATAATTAAGCCA    | 32 |
| 40 | TAAGTCCTACCAAGTA CCGCACTCTTAGTTGC  | 32 |
| 41 | ACGCTCAAATAAGAA TAAACACCGTGAATTT   | 32 |
| 42 | AGGCGTTACAGTAGGG CTTAATTGACAATAGA  | 32 |
| 43 | ATCAAAATCGTCGCTA TTAATTAACGGATTCTG | 32 |
| 44 | CTGTAAATCATAGGTC GAGAGACGATAAATA   | 32 |
| 45 | CCTGATTGAAAGAAAT TGCGTAGACCCGAACG  | 32 |
| 46 | ACAGAAATCTTTGAAT ACCAAGTTCCTTGCTT  | 32 |
| 47 | TTATTAATGCCGTCAA TAGATAATCAGAGGTG  | 32 |
| 48 | AGATTAGATTTAAAAG TTTGAGTACACGTAAA  | 32 |
| 49 | AGGCGGTCATTAGTCT TTAATGCGCAATATTA  | 32 |
| 50 | GAATGGCTAGTATTA CACCGCCTCAACTAAT   | 32 |
| 51 | CCGCCAGCCATTGCAA CAGGAAAAATATTTTT  | 32 |
| 52 | CCCTCAGAACCGCCAC CCTCAGAACTGAGACT  | 32 |
| 53 | CCTCAAGAATACATGG CTTTTGATAGAACCAC  | 32 |
| 54 | TAAGCGTCGAAGGATT GGATTAGTACCGCCA   | 32 |
| 55 | CACCAGAGTTCGGTCA TAGCCCCCGCCAGCAA  | 32 |
| 56 | TCGGCATTCCGCCGCC AGCATTGACGTTCCAG  | 32 |
| 57 | AATCACCAAATAGAAA ATTCATATATAACGGA  | 32 |
| 58 | TCACAATCGTAGCACC ATTACCATCGTTTTCA  | 32 |
| 59 | ATACCCAAGATAACCC ACAAGAATAAACGATT  | 32 |
| 60 | ATCAGAGAAAGAACTG GCATGATTTTTATTTG  | 32 |
| 61 | TTTTGTTTAAGCCTTA AATCAAGAATCGAGAA  | 32 |
| 62 | AGGTTTTGAACGTCAA AAATGAAAGCGCTAAT  | 32 |
| 63 | CAAGCAAGACGCGCCT GTTTATCAAGAATCGC  | 32 |
| 64 | AATGCAGACCGTTTTT ATTTTCATCTTGCGGG  | 32 |
| 65 | CATATTTAGAAATACC GACCGTGTTACCTTTT  | 32 |
| 66 | AATGGTTTACAACGCC AACATGTAGTTCAGCT  | 32 |
| 67 | TAACCTCCATATGTGA GTGAATAAACAAAATC  | 32 |
| 68 | AAATCAATGGCTTAGG TTGGGTTACTAAATTT  | 32 |
| 69 | GCGCAGAGATATCAAA ATTATTTGACATTATC  | 32 |
| 70 | AACCTACCGCGAATTA TTCATTTCCAGTACAT  | 32 |
| 71 | ATTTTGCCTTTTAGG AGCACTAAGCAACAGT   | 32 |
| 72 | CTAAAATAGAACAAAG AAACCACCAGGGTTAG  | 32 |
| 73 | GCCACGCTATACGTGG CACAGACAACGCTCAT  | 32 |
| 74 | GCGTAAGAGAGAGCCA CAGCAAAAAGGTTAT   | 32 |

---

---

|     |                                    |    |
|-----|------------------------------------|----|
| 75  | GGAAATACCTACATTT TGACGCTCACCTGAAA  | 32 |
| 76  | TATCACCGTACTCAGG AGGTTTAGCGGGGTTT  | 32 |
| 77  | TGCTCAGTCAGTCTCT GAATTTACCAGGAGGT  | 32 |
| 78  | GGAAAGCGACCAGGCG GATAAGTGAATAGGTG  | 32 |
| 79  | TGAGGCAGGCGTCAGA TGTAGCGTAGCAAGG   | 32 |
| 80  | TGCCTTTAGTCAGACG ATTGGCCTGCCAGAAT  | 32 |
| 81  | CCGAAACACACCACG GAATAAGTAAGACTCC   | 32 |
| 82  | ACGCAAAGGTCACCAA GAAACCAATCAAGTT   | 32 |
| 83  | TTATTACGGTCAGAGG GTAATTGAATAGCAGC  | 32 |
| 84  | TGAACAAACAGTATGT AGCAAATAAAAGAA    | 32 |
| 85  | CTTTACAGTTAGCGAA CCTCCCGACGTAGGAA  | 32 |
| 86  | GAGGCGTTAGAGAATA ACATAAAAGAACACCC  | 32 |
| 87  | TCATTACCCGACAATA AACACATATTTAGGC   | 32 |
| 88  | CCAGACGAGCGCCCAA TAGCAAGCAAGAACGC  | 32 |
| 89  | AGAGGCATAATTTTCAT CTTCTGACTATAACTA | 32 |
| 90  | TTTTAGTTTTTCGAGC CAGTAATAAATTCTGT  | 32 |
| 91  | TATGTAAACCTTTTTT AATGGAAAAATTACCT  | 32 |
| 92  | TTGAATTATGCTGATG CAAATCCACAAATATA  | 32 |
| 93  | GAGCAAAAACCTTCTGA ATAATGGAAGAAGGAG | 32 |
| 94  | TGGATTATGAAGATGA TGAAACAAAATTTTCAT | 32 |
| 95  | CGGAATTATTGAAAGG AATTGAGGTGAAAAAT  | 32 |
| 96  | ATCAACAGTCATCATA TTCCTGATTGATTGTT  | 32 |
| 97  | CTAAAGCAAGATAGAA CCCTTCTGAATCGTCT  | 32 |
| 98  | GCCAACAGTCACCTTG CTGAACCTGTTGGCAA  | 32 |
| 99  | GAAATGGATTATTTAC TTGGCAGACATTCTG   | 32 |
| 112 | CCGAAATCCGAAAATC TGTTTGAAGCCGGAA   | 32 |
| 113 | CCAGCAGGGGCAAAAT CCCTTATAAAGCCGGC  | 32 |
| 114 | GCATAAAGTTCCACAC AACATACGAAGCGCCA  | 32 |
| 115 | GCTCACAATGTAAAGC CTGGGGTGGGTTTGCC  | 32 |
| 116 | TTCGCCATTGCCGGAA ACCAGGCATTAATCA   | 32 |
| 117 | GCTTCTGGTCAGGCTG CGCAACTGTGTTATCC  | 32 |
| 118 | GTTAAAATTTTAACCA ATAGGAACCCGGCACC  | 32 |
| 119 | AGACAGTCATTCAAAA GGGTGAGAAGCTATAT  | 32 |
| 120 | AGGTAAAGAAATCACC ATCAATATAATATTTT  | 32 |
| 121 | TTTCATTTGGTCAATA ACCTGTTTATATCGCG  | 32 |
| 122 | TCGCAAATGGGGCGCG AGCTGAAATAATGTGT  | 32 |
| 123 | TTTTAATTGCCCGAAA GACTTCAAAACACTAT  | 32 |
| 124 | AAGAGGAACGAGCTTC AAAGCGAAGATACATT  | 32 |
| 125 | GGAATTACTCGTTTAC CAGACGACAAAAGATT  | 32 |
| 126 | GAATAAGGACGTAACA AAGCTGCTCTAAAACA  | 32 |
| 127 | CCAAATCACTTGCCCT GACGAGAACGCCAAAA  | 32 |
| 128 | CTCATCTTGAGGCAAA AGAATACAGTGAATTT  | 32 |
| 129 | AAACGAAATGACCCCC AGCGATTATTCATTAC  | 32 |
| 130 | CTTAAACATCAGCTTG CTTTCGAGCGTAACAC  | 32 |

---

---

|     |                                    |    |
|-----|------------------------------------|----|
| 131 | TCGGTTTAGCTTGATA CCGATAGTCCAACCTA  | 32 |
| 132 | TGAGTTTCGTCACCAG TACAACTTAATTGTA   | 32 |
| 133 | CCCCGATTTAGAGCTT ACGGGGAAATCAAAA   | 32 |
| 134 | GAATAGCCGCAAGCGG CCACGCTCCTAATGA   | 32 |
| 135 | GAGTTGCACGAGATAG GGTGAGTAAGGGAGC   | 32 |
| 136 | GTGAGCTAGTTTCCTG TGTGAAATTTGGGAAG  | 32 |
| 137 | TCATAGCTACTCACAT TAATTGCGCCCTGAGA  | 32 |
| 138 | GGCGATCGCACTCCAG CCAGCTTTGCCATCAA  | 32 |
| 139 | GAAGATCGGTGCGGGC CTCTTCGCAATCATGG  | 32 |
| 140 | AAATAATTTTAAATTG TAAACGTTGATATTCA  | 32 |
| 141 | GCAAATATCGCGTCTG GCCTTCCTGGCCTCAG  | 32 |
| 142 | ACCGTTCTAAATGCAA TGCCTGAGAGGTGGCA  | 32 |
| 143 | TATATTTTAGCTGATA AATTAATGTTGTATAA  | 32 |
| 144 | TCAATTCTTTTAGTTT GACCATTACCAGACCG  | 32 |
| 145 | CGAGTAGAACTAATAG TAGTAGCAAACCTCA   | 32 |
| 146 | GAAGCAAAAAAGCGGA TTGCATCAGATAAAAA  | 32 |
| 147 | TCAGAAGCCTCCAACA GGTCAGGATCTGCGAA  | 32 |
| 148 | CCAAAATATAATGCAG ATACATAAACACCAGA  | 32 |
| 149 | CATTCAACGCGAGAGG CTTTTGCATATTATAG  | 32 |
| 150 | ACGAGTAGTGACAAGA ACCGGATATACCAAGC  | 32 |
| 151 | AGTAATCTTAAATTGG GCTTGAGAGAATACCA  | 32 |
| 152 | GCGAAACATGCCACTA CGAAGGCATGCGCCGA  | 32 |
| 153 | ATACGTAAAAGTACAA CGGAGATTTTCATCAAG | 32 |
| 154 | CAATGACACTCCAAAA GGAGCCTTACAACGCC  | 32 |
| 155 | AAAAAAGGACAACCAT CGCCCACGCGGGTAAA  | 32 |
| 156 | TGTAGCATTCCACAGA CAGCCCTCATCTCCAA  | 32 |
| 157 | GTAAAGCACTAAATCG GAACCCTAGTTGTTCC  | 32 |
| 158 | AGTTTGGAGCCCTTCA CCGCCTGGTTGCGCTC  | 32 |
| 159 | AGCTGATTACAAGAGT CCACTATTGAGGTGCC  | 32 |
| 160 | ACTGCCCGCCGAGCTC GAATTCGTTATTACGC  | 32 |
| 161 | CCCGGGTACTTTCCAG TCGGGAAACGGGCAAC  | 32 |
| 162 | CAGCTGGCGGACGACG ACAGTATCGTAGCCAG  | 32 |
| 163 | GTTTGAGGGAAAGGGG GATGTGCTAGAGGATC  | 32 |
| 164 | CTTTCATCCCCAAAAA AGGAAGACCGGAGAG   | 32 |
| 165 | AGAAAAGCAACATTAA ATGTGAGCATCTGCCA  | 32 |
| 166 | GGTAGCTAGGATAAAA ATTTTTAGTTAACATC  | 32 |
| 167 | CAACGCAATTTTTGAG AGATCTACTGATAATC  | 32 |
| 168 | CAATAAATACAGTTGA TTCCCAATTTAGAGAG  | 32 |
| 169 | TCCATATACATACAGG CAAGGCAACTTTATTT  | 32 |
| 170 | TACCTTTAAGGTCTTT ACCCTGACAAAGAAGT  | 32 |
| 171 | CAAAAATCATTGCTCC TTTTGATAAGTTTCAT  | 32 |
| 172 | TTTGCCAGATCAGTTG AGATTTAGTGGTTTAA  | 32 |
| 173 | AAAGATTCAGGGGGTA ATAGTAAACCATAAAT  | 32 |
| 174 | TTTCAACTATAGGCTG GCTGACCTTGTATCAT  | 32 |

---

---

|               |                                      |    |
|---------------|--------------------------------------|----|
| 175           | CCAGGCGCTTAATCAT TGTGAATTACAGGTAG    | 32 |
| 176           | CGCCTGATGGAAGTTT CCATTAACATAACCG     | 32 |
| 177           | TTTCATGAAAATTGTGTCGAAATCTGTACAGA     | 32 |
| 178           | ATATATTCTTTTTTCA CGTTGAAAATAGTTAG    | 32 |
| 179           | AATAATAAGGTCGCTG AGGCTTGCAAAGACTT    | 32 |
| 180           | CGTAACGATCTAAAGT TTTGTCGTGAATTGCG    | 32 |
| 181           | ACCCAAATCAAGTTTT TTGGGGTCAAAGAACG    | 32 |
| 182           | TGGACTCCCTTTTAC CAGTGAGACCTGTCGT     | 32 |
| 183           | TGGTTTTTAACGTCAA AGGGCGAAGAACCATC    | 32 |
| 184           | GCCAGCTGCCTGCAGG TCGACTCTGCAAGGCG    | 32 |
| 185           | CTTGCATGCATTAATG AATCGGCCCGCCAGGG    | 32 |
| 186           | ATTAAGTTCGCATCGT AACCGTGCAGTAACA     | 32 |
| 187           | TAGATGGGGGGTAACG CCAGGGTTGTGCCAAG    | 32 |
| 188           | ACCCGTCGTCATATGT ACCCCGGTAAAGGCTA    | 32 |
| 189           | CATGTCAAGATTCTCC GTGGGAACCGTTGGTG    | 32 |
| 190           | TCAGGTCACTTTTGCG GGAGAAGCAGAATTAG    | 32 |
| 191           | CTGTAATATTGCCTGA GAGTCTGGAAAAGTAG    | 32 |
| 192           | CAAAATTAAGTACGG TGTCTGGAAGAGGTCA     | 32 |
| 193           | TGCAACTAAGCAATAA AGCCTCAGTTATGACC    | 32 |
| 194           | TTTTTGCGCAGAAAAC GAGAATGAATGTTTAG    | 32 |
| 195           | AAACAGTTGATGGCTT AGAGCTTATTTAAATA    | 32 |
| 196           | ACTGGATAACGGAACA ACATTATTACCTTATG    | 32 |
| 197           | ACGAACTAGCGTCCAA TACTGCGGAATGCTTT    | 32 |
| 198           | CGATTTTAGAGGACAG ATGAACGGCGCGACCT    | 32 |
| 199           | CTTTGAAAAGAACTGG CTCATTATTTAATAAA    | 32 |
| 200           | GCTCCATGAGAGGCTTT GAGGACTAGGGAGTT    | 32 |
| 201           | ACGGCTACTTACTTAG CCGGAACGCTGACCAA    | 32 |
| 202           | AAAGGCCGAAAGGAAC AACTAAAGCTTTCCAG    | 32 |
| 203           | GAGAATAGCTTTTTCG GGATCGTCGGGTAGCA    | 32 |
| 204           | ACGTTAGTAAATGAAT TTTCTGTAAGCGGAGT    | 32 |
| Loop 1        | AACATCACTTGCCTGAGTAGAAGAACT          | 27 |
| Loop 2        | TGTAGCAATACTTCTTTGATTAGTAAT          | 27 |
| Loop 3        | AGTCTGTCCATCACGCAAATTAACCGT          | 27 |
| Loop 4        | ATAATCAGTGAGGCCACCGAGTAAAAG          | 27 |
| Loop 5        | ACGCCAGAATCCTGAGAAGTGTTTTT           | 26 |
| Loop 6        | TTAAAGGGATTTTAGACAGGAACGGT           | 26 |
| Loop 7        | AGAGCGGGAGCTAACAGGAGGCCGA            | 26 |
| Loop 8        | TATAACGTGCTTTCCTCGTTAGAATC           | 26 |
| Loop 9        | GTAATATGGTTGCTTTGACGAGCACG           | 26 |
| Loop 10       | GCGCTTAATGCGCCGCTACAGGGCGC           | 26 |
| Capture 200-1 | GCTCCATGAGAGGCTTTGAGGTAGTCTGTCAGGTCC | 36 |
| Capture 200-2 | ACGCTCGGTCAGGATCTTCATGAGGACTAGGGAGTT | 36 |
| Capture 152-1 | GCGAAACATGCCACTATGAGGTAGTCTGTCAGGTCC | 36 |
| Capture 152-2 | ACGCTCGGTCAGGATCTTCACGAAGGCATGCGCCGA | 36 |

---

---

|               |                                                                                                   |    |
|---------------|---------------------------------------------------------------------------------------------------|----|
| Capture 29-1  | CTGAAACAGGTAATAATGAGGTAGTCTGTCAGGTCC                                                              | 36 |
| Capture 29-2  | ACGCTCGGTCAGGATCTTCAGTTTTAACCCCTCAGA                                                              | 36 |
| Capture 77-1  | TGCTCAGTCAGTCTCTTGAGGTAGTCTGTCAGGTCC                                                              | 36 |
| Capture 77-2  | ACGCTCGGTCAGGATCTTCAGAATTTACCAGGAGGT                                                              | 36 |
| Capture 196-1 | ACTGGATAACGGAACATGAGGTAGTCTGTCAGGTCC                                                              | 36 |
| Capture196-2  | ACGCTCGGTCAGGATCTTCAACATTATTACCTTATG                                                              | 36 |
| Capture 148-1 | AAATAATTTTAAATTGTGAGGTAGTCTGTCAGGTCC                                                              | 36 |
| Capture 148-2 | ACGCTCGGTCAGGATCTTCATAAACGTTGATATTCA                                                              | 36 |
| Capture 33-1  | ACGCTCAAATAAGAATGAGGTAGTCTGTCAGGTCC                                                               | 36 |
| Capture 33-2  | ACGCTCGGTCAGGATCTTCATAAACACCGTGAATTT                                                              | 36 |
| Capture 81-1  | AGAGGCATAATTTTCAT TGAGGTAGTCTGTCAGGTCC                                                            | 36 |
| Capture 81-2  | ACGCTCGGTCAGGATCTTCACTTCTGACTATAACTA                                                              | 36 |
| Capture 188-1 | ACCCGTCGTCATATGTTGAGGTAGTCTGTCAGGTCC                                                              | 36 |
| Capture 188-2 | ACGCTCGGTCAGGATCTTCAACCCCGTAAAGGCTA                                                               | 36 |
| Capture 140-1 | AAATAATTTTAAATTGTGAGGTAGTCTGTCAGGTCC                                                              | 36 |
| Capture 140-2 | ACGCTCGGTCAGGATCTTCATAAACGTTGATATTCA                                                              | 36 |
| Capture 41-1  | ACGCTCAAATAAGAATGAGGTAGTCTGTCAGGTCC                                                               | 36 |
| Capture 41-2  | ACGCTCGGTCAGGATCTTCATAAACACCGTGAATTT                                                              | 36 |
| Capture 89-1  | AGAGGCATAATTTTCATTGAGGTAGTCTGTCAGGTCC                                                             | 36 |
| Capture 89-2  | ACGCTCGGTCAGGATCTTCA CTTCTGACTATAACTA                                                             | 36 |
| Capture 184-1 | GCCAGCTGCCTGCAGGTGAGGTAGTCTGTCAGGTCC                                                              | 36 |
| Capture 184-2 | ACGCTCGGTCAGGATCTTCATCGACTCTGCAAGGCG                                                              | 36 |
| Capture 136-1 | GTGAGCTAGTTTCCTGTGAGGTAGTCTGTCAGGTCC                                                              | 36 |
| Capture 136-2 | ACGCTCGGTCAGGATCTTCATGTGAAATTTGGGAAG                                                              | 36 |
| Capture 45-1  | CCTGATTGAAAGAAATTGAGGTAGTCTGTCAGGTCC                                                              | 36 |
| Capture 45-2  | ACGCTCGGTCAGGATCTTCATGCGTAGACCCGAACG                                                              | 36 |
| Capture 93-1  | GAGCAAAAATTCTGATGAGGTAGTCTGTCAGGTCC                                                               | 36 |
| Capture 93-2  | ACGCTCGGTCAGGATCTTCAATAATGGAAGAAGGAG                                                              | 36 |
| C2NP          | ACTGGGCGAAACAAGTCTATTGACTATGAGC                                                                   | 31 |
| Extended C2NP | GGA CCT GAC AGA CTA CCT CAT GAA GAT CCT GAC CGA GCG<br>TACT GGG CGA AAC AAG TCT ATT GAC TAT GAG C | 71 |

---

Table S2.1 Cytotoxicity of folding buffer on K299 cells.

| C* (mM)             | 12.5      | 6.25      | 3.125     | 1.25      | 0.625     |
|---------------------|-----------|-----------|-----------|-----------|-----------|
| Inhibition rate (%) | 9.53±0.51 | 6.54±0.50 | 3.96±0.21 | 2.33±0.26 | 0.93±0.13 |

\*: Concentration of Mg<sup>2+</sup> in folding buffer.

Table S2.2 Cytotoxicity of RE on K299 cells.

| C <sub>RE</sub> (nM) |      | 4         | 2         | 1         | 0.5       | 0.1       |
|----------------------|------|-----------|-----------|-----------|-----------|-----------|
| Inhibition rate (%)  | 24 h | 1.86±0.28 | 0.99±0.41 | 0.95±0.28 | 0.99±0.28 | 0.42±0.12 |
|                      | 48 h | 1.36±0.39 | 0.99±0.34 | 1.57±0.37 | 2.13±0.31 | 1.49±0.33 |
|                      | 72 h | 2.87±0.45 | 1.99±0.45 | 1.13±0.56 | 2.98±0.11 | 1.41±0.31 |

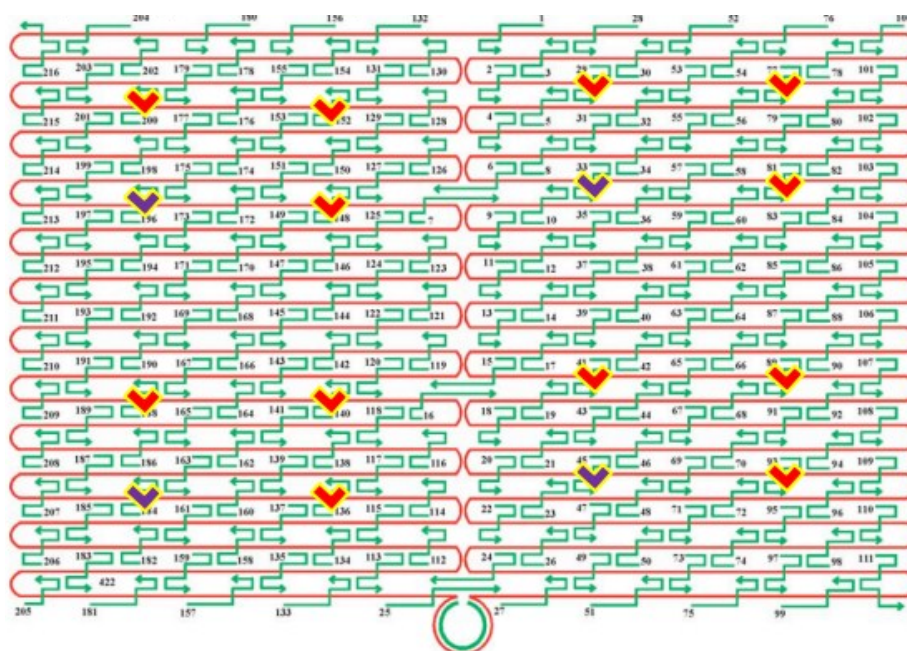

Fig. S1 Distribution of aptamers on DNA Origami nanostructure (For RE-4Apt, strand 196, 184, 33 and 45 were replaced with capture ssDNA. For RE-16Apt, strand 200, 196, 188, 184, 152, 148, 140, 136, 29, 33, 41, 45, 77, 81, 89 and 93 were replaced with capture ssDNA)<sup>1</sup>.

## Reference

1. Y. Ke, S. Lindsay, Y. Chang, Y. Liu and H. Yan, *Science*, 2008, **319**, 180-183.
